# Supplementary material for: Low prevalence of the BCR–ABL1 fusion gene in a normal population in southern Sarawak
Source: Springer Nature journal article supplement (doi:10.1007/s12185-019-02768-x), 2019-11-09
Supplement: MOESM1 [file 17370360]

Supplementary Figure 1. Sequencing of *BCR-ABL1* in positive normal individual and CML patient #4 in Table 2

....|....| ....|....| ....|....| ....|....| ....|....| ....|....|

5 15 25 35 45 55

P4 ~~~~~~~~~~ ~~~~~~~~~~ ~~~~~~~~~~ ~~~~~~~~~~ ~~~~~~~~~~ ~~~~~~~~~~

Subject GNNNNNNNN~ ~~~~~~~~~~ ~~~~~~~~~~ ~~~~~~~~~~ ~~~~~~~~~~ ~~~~~~~~~~

BCR-ABL1 ATGGTGGACC CGGTGGGCTT CGCGGAGGCG TGGAAGGCGC AGTTCCCGGA CTCAGAGCCC

BCR ATGGTGGACC CGGTGGGCTT CGCGGAGGCG TGGAAGGCGC AGTTCCCGGA CTCAGAGCCC

ABL ~~~~~~~~~~ ~~~~~~~~~~ ~~~~~~~~~~ ~~~~~~~~~~ ~~~~~~~~~~ ~~~~~~~~~~

....|....| ....|....| ....|....| ....|....| ....|....| ....|....|

65 75 85 95 105 115

P4 ~~~~~~~~~~ ~~~~~~~~~~ ~~~~~~~~~~ ~~~~~~~~~~ ~~~~~~~~~~ ~~~~~~~~~~

Subject ~~~~~~~~~~ ~~~~~~~~~~ ~~~~~~~~~~ ~~~~~~~~~~ ~~~~~~~~~~ ~~~~~~~~~~

BCR-ABL1 CCGCGCATGG AGCTGCGCTC AGTGGGCGAC ATCGAGCAGG AGCTGGAGCG CTGCAAGGCC

BCR CCGCGCATGG AGCTGCGCTC AGTGGGCGAC ATCGAGCAGG AGCTGGAGCG CTGCAAGGCC

ABL ~~~~~~~~~~ ~~~~~~~~~~ ~~~~~~~~~~ ~~~~~~~~~~ ~~~~~~~~~~ ~~~~~~~~~~

....|....| ....|....| ....|....| ....|....| ....|....| ....|....|

125 135 145 155 165 175

P4 ~~~~~~~~~~ ~~~~~~~~~~ ~~~~~~~~~~ ~~~~~~~~~~ ~~~~~~~~~~ ~~~~~~~~~~

Subject ~~~~~~~~~~ ~~~~~~~~~~ ~~~~~~~~~~ ~~~~~~~~~~ ~~~~~~~~~~ ~~~~~~~~~~

BCR-ABL1 TCCATTCGGC GCCTGGAGCA GGAGGTGAAC CAGGAGCGCT TCCGCATGAT CTACCTGCAG

BCR TCCATTCGGC GCCTGGAGCA GGAGGTGAAC CAGGAGCGCT TCCGCATGAT CTACCTGCAG

ABL ~~~~~~~~~~ ~~~~~~~~~~ ~~~~~~~~~~ ~~~~~~~~~~ ~~~~~~~~~~ ~~~~~~~~~~

....|....| ....|....| ....|....| ....|....| ....|....| ....|....|

185 195 205 215 225 235

P4 ~~~~~~~~~~ ~~~~~~~~~~ ~~~~~~~~~~ ~~~~~~~~~~ ~~~~~~~~~~ ~~~~~~~~~~

Subject ~~~~~~~~~~ ~~~~~~~~~~ ~~~~~~~~~~ ~~~~~~~~~~ ~~~~~~~~~~ ~~~~~~~~~~

BCR-ABL1 ACGTTGCTGG CCAAGGAAAA GAAGAGCTAT GACCGGCAGC GATGGGGCTT CCGGCGCGCG

BCR ACGTTGCTGG CCAAGGAAAA GAAGAGCTAT GACCGGCAGC GATGGGGCTT CCGGCGCGCG

ABL ~~~~~~~~~~ ~~~~~~~~~~ ~~~~~~~~~~ ~~~~~~~~~~ ~~~~~~~~~~ ~~~~~~~~~~

....|....| ....|....| ....|....| ....|....| ....|....| ....|....|

245 255 265 275 285 295

P4 ~~~~~~~~~~ ~~~~~~~~~~ ~~~~~~~~~~ ~~~~~~~~~~ ~~~~~~~~~~ ~~~~~~~~~~

Subject ~~~~~~~~~~ ~~~~~~~~~~ ~~~~~~~~~~ ~~~~~~~~~~ ~~~~~~~~~~ ~~~~~~~~~~

BCR-ABL1 GCGCAGGCCC CCGACGGCGC CTCCGAGCCC CGAGCGTCCG CGTCGCGCCC GCAGCCAGCG

BCR GCGCAGGCCC CCGACGGCGC CTCCGAGCCC CGAGCGTCCG CGTCGCGCCC GCAGCCAGCG

ABL ~~~~~~~~~~ ~~~~~~~~~~ ~~~~~~~~~~ ~~~~~~~~~~ ~~~~~~~~~~ ~~~~~~~~~~

....|....| ....|....| ....|....| ....|....| ....|....| ....|....|

305 315 325 335 345 355

P4 ~~~~~~~~~~ ~~~~~~~~~~ ~~~~~~~~~~ ~~~~~~~~~~ ~~~~~~~~~~ ~~~~~~~~~~

Subject ~~~~~~~~~~ ~~~~~~~~~~ ~~~~~~~~~~ ~~~~~~~~~~ ~~~~~~~~~~ ~~~~~~~~~~

BCR-ABL1 CCCGCCGACG GAGCCGACCC GCCGCCCGCC GAGGAGCCCG AGGCCCGGCC CGACGGCGAG

BCR CCCGCCGACG GAGCCGACCC GCCGCCCGCC GAGGAGCCCG AGGCCCGGCC CGACGGCGAG

ABL ~~~~~~~~~~ ~~~~~~~~~~ ~~~~~~~~~~ ~~~~~~~~~~ ~~~~~~~~~~ ~~~~~~~~~~

....|....| ....|....| ....|....| ....|....| ....|....| ....|....|

365 375 385 395 405 415

P4 ~~~~~~~~~~ ~~~~~~~~~~ ~~~~~~~~~~ ~~~~~~~~~~ ~~~~~~~~~~ ~~~~~~~~~~

Subject ~~~~~~~~~~ ~~~~~~~~~~ ~~~~~~~~~~ ~~~~~~~~~~ ~~~~~~~~~~ ~~~~~~~~~~

BCR-ABL1 GGTTCTCCGG GTAAGGCCAG GCCCGGGACC GCCCGCAGGC CCGGGGCAGC CGCGTCGGGG

BCR GGTTCTCCGG GTAAGGCCAG GCCCGGGACC GCCCGCAGGC CCGGGGCAGC CGCGTCGGGG

ABL ~~~~~~~~~~ ~~~~~~~~~~ ~~~~~~~~~~ ~~~~~~~~~~ ~~~~~~~~~~ ~~~~~~~~~~

....|....| ....|....| ....|....| ....|....| ....|....| ....|....|

425 435 445 455 465 475

P4 ~~~~~~~~~~ ~~~~~~~~~~ ~~~~~~~~~~ ~~~~~~~~~~ ~~~~~~~~~~ ~~~~~~~~~~

Subject ~~~~~~~~~~ ~~~~~~~~~~ ~~~~~~~~~~ ~~~~~~~~~~ ~~~~~~~~~~ ~~~~~~~~~~

BCR-ABL1 GAACGGGACG ACCGGGGACC CCCCGCCAGC GTGGCGGCGC TCAGGTCCAA CTTCGAGCGG

BCR GAACGGGACG ACCGGGGACC CCCCGCCAGC GTGGCGGCGC TCAGGTCCAA CTTCGAGCGG

ABL ~~~~~~~~~~ ~~~~~~~~~~ ~~~~~~~~~~ ~~~~~~~~~~ ~~~~~~~~~~ ~~~~~~~~~~

....|....| ....|....| ....|....| ....|....| ....|....| ....|....|

485 495 505 515 525 535

P4 ~~~~~~~~~~ ~~~~~~~~~~ ~~~~~~~~~~ ~~~~~~~~~~ ~~~~~~~~~~ ~~~~~~~~~~

Subject ~~~~~~~~~~ ~~~~~~~~~~ ~~~~~~~~~~ ~~~~~~~~~~ ~~~~~~~~~~ ~~~~~~~~~~

BCR-ABL1 ATCCGGAAGG GCCATGGCCA GCCCGGGGCG GACGCCGAGA AGCCCTTCTA CGTGAACGTC

BCR ATCCGGAAGG GCCATGGCCA GCCCGGGGCG GACGCCGAGA AGCCCTTCTA CGTGAACGTC

ABL ~~~~~~~~~~ ~~~~~~~~~~ ~~~~~~~~~~ ~~~~~~~~~~ ~~~~~~~~~~ ~~~~~~~~~~

....|....| ....|....| ....|....| ....|....| ....|....| ....|....|

545 555 565 575 585 595

P4 ~~~~~~~~~~ ~~~~~~~~~~ ~~~~~~~~~~ ~~~~~~~~~~ ~~~~~~~~~~ ~~~~~~~~~~

Subject ~~~~~~~~~~ ~~~~~~~~~~ ~~~~~~~~~~ ~~~~~~~~~~ ~~~~~~~~~~ ~~~~~~~~~~

BCR-ABL1 GAGTTTCACC ACGAGCGCGG CCTGGTGAAG GTCAACGACA AAGAGGTGTC GGACCGCATC

BCR GAGTTTCACC ACGAGCGCGG CCTGGTGAAG GTCAACGACA AAGAGGTGTC GGACCGCATC

ABL ~~~~~~~~~~ ~~~~~~~~~~ ~~~~~~~~~~ ~~~~~~~~~~ ~~~~~~~~~~ ~~~~~~~~~~

....|....| ....|....| ....|....| ....|....| ....|....| ....|....|

605 615 625 635 645 655

P4 ~~~~~~~~~~ ~~~~~~~~~~ ~~~~~~~~~~ ~~~~~~~~~~ ~~~~~~~~~~ ~~~~~~~~~~

Subject ~~~~~~~~~~ ~~~~~~~~~~ ~~~~~~~~~~ ~~~~~~~~~~ ~~~~~~~~~~ ~~~~~~~~~~

BCR-ABL1 AGCTCCCTTG GCAGCCAGGC CATGCAGATG GAGCGCAAAA AGTCCCAGCA CGGCGCGGGC

BCR AGCTCCCTTG GCAGCCAGGC CATGCAGATG GAGCGCAAAA AGTCCCAGCA CGGCGCGGGC

ABL ~~~~~~~~~~ ~~~~~~~~~~ ~~~~~~~~~~ ~~~~~~~~~~ ~~~~~~~~~~ ~~~~~~~~~~

....|....| ....|....| ....|....| ....|....| ....|....| ....|....|

665 675 685 695 705 715

P4 ~~~~~~~~~~ ~~~~~~~~~~ ~~~~~~~~~~ ~~~~~~~~~~ ~~~~~~~~~~ ~~~~~~~~~~

Subject ~~~~~~~~~~ ~~~~~~~~~~ ~~~~~~~~~~ ~~~~~~~~~~ ~~~~~~~~~~ ~~~~~~~~~~

BCR-ABL1 TCGAGCGTGG GGGATGCATC CAGGCCCCCT TACCGGGGAC GCTCCTCGGA GAGCAGCTGC

BCR TCGAGCGTGG GGGATGCATC CAGGCCCCCT TACCGGGGAC GCTCCTCGGA GAGCAGCTGC

ABL ~~~~~~~~~~ ~~~~~~~~~~ ~~~~~~~~~~ ~~~~~~~~~~ ~~~~~~~~~~ ~~~~~~~~~~

....|....| ....|....| ....|....| ....|....| ....|....| ....|....|

725 735 745 755 765 775

P4 ~~~~~~~~~~ ~~~~~~~~~~ ~~~~~~~~~~ ~~~~~~~~~~ ~~~~~~~~~~ ~~~~~~~~~~

Subject ~~~~~~~~~~ ~~~~~~~~~~ ~~~~~~~~~~ ~~~~~~~~~~ ~~~~~~~~~~ ~~~~~~~~~~

BCR-ABL1 GGCGTCGACG GCGACTACGA GGACGCCGAG TTGAACCCCC GCTTCCTGAA GGACAACCTG

BCR GGCGTCGACG GCGACTACGA GGACGCCGAG TTGAACCCCC GCTTCCTGAA GGACAACCTG

ABL ~~~~~~~~~~ ~~~~~~~~~~ ~~~~~~~~~~ ~~~~~~~~~~ ~~~~~~~~~~ ~~~~~~~~~~

....|....| ....|....| ....|....| ....|....| ....|....| ....|....|

785 795 805 815 825 835

P4 ~~~~~~~~~~ ~~~~~~~~~~ ~~~~~~~~~~ ~~~~~~~~~~ ~~~~~~~~~~ ~~~~~~~~~~

Subject ~~~~~~~~~~ ~~~~~~~~~~ ~~~~~~~~~~ ~~~~~~~~~~ ~~~~~~~~~~ ~~~~~~~~~~

BCR-ABL1 ATCGACGCCA ATGGCGGTAG CAGGCCCCCT TGGCCGCCCC TGGAGTACCA GCCCTACCAG

BCR ATCGACGCCA ATGGCGGTAG CAGGCCCCCT TGGCCGCCCC TGGAGTACCA GCCCTACCAG

ABL ~~~~~~~~~~ ~~~~~~~~~~ ~~~~~~~~~~ ~~~~~~~~~~ ~~~~~~~~~~ ~~~~~~~~~~

....|....| ....|....| ....|....| ....|....| ....|....| ....|....|

845 855 865 875 885 895

P4 ~~~~~~~~~~ ~~~~~~~~~~ ~~~~~~~~~~ ~~~~~~~~~~ ~~~~~~~~~~ ~~~~~~~~~~

Subject ~~~~~~~~~~ ~~~~~~~~~~ ~~~~~~~~~~ ~~~~~~~~~~ ~~~~~~~~~~ ~~~~~~~~~~

BCR-ABL1 AGCATCTACG TCGGGGGCAT CATGGAAGGG GAGGGCAAGG GCCCGCTCCT GCGCAGCCAG

BCR AGCATCTACG TCGGGGGCAT CATGGAAGGG GAGGGCAAGG GCCCGCTCCT GCGCAGCCAG

ABL ~~~~~~~~~~ ~~~~~~~~~~ ~~~~~~~~~~ ~~~~~~~~~~ ~~~~~~~~~~ ~~~~~~~~~~

....|....| ....|....| ....|....| ....|....| ....|....| ....|....|

905 915 925 935 945 955

P4 ~~~~~~~~~~ ~~~~~~~~~~ ~~~~~~~~~~ ~~~~~~~~~~ ~~~~~~~~~~ ~~~~~~~~~~

Subject ~~~~~~~~~~ ~~~~~~~~~~ ~~~~~~~~~~ ~~~~~~~~~~ ~~~~~~~~~~ ~~~~~~~~~~

BCR-ABL1 AGCACCTCTG AGCAGGAGAA GCGCCTTACC TGGCCCCGCA GGTCCTACTC CCCCCGGAGT

BCR AGCACCTCTG AGCAGGAGAA GCGCCTTACC TGGCCCCGCA GGTCCTACTC CCCCCGGAGT

ABL ~~~~~~~~~~ ~~~~~~~~~~ ~~~~~~~~~~ ~~~~~~~~~~ ~~~~~~~~~~ ~~~~~~~~~~

....|....| ....|....| ....|....| ....|....| ....|....| ....|....|

965 975 985 995 1005 1015

P4 ~~~~~~~~~~ ~~~~~~~~~~ ~~~~~~~~~~ ~~~~~~~~~~ ~~~~~~~~~~ ~~~~~~~~~~

Subject ~~~~~~~~~~ ~~~~~~~~~~ ~~~~~~~~~~ ~~~~~~~~~~ ~~~~~~~~~~ ~~~~~~~~~~

BCR-ABL1 TTTGAGGATT GCGGAGGCGG CTATACCCCG GACTGCAGCT CCAATGAGAA CCTCACCTCC

BCR TTTGAGGATT GCGGAGGCGG CTATACCCCG GACTGCAGCT CCAATGAGAA CCTCACCTCC

ABL ~~~~~~~~~~ ~~~~~~~~~~ ~~~~~~~~~~ ~~~~~~~~~~ ~~~~~~~~~~ ~~~~~~~~~~

....|....| ....|....| ....|....| ....|....| ....|....| ....|....|

1025 1035 1045 1055 1065 1075

P4 ~~~~~~~~~~ ~~~~~~~~~~ ~~~~~~~~~~ ~~~~~~~~~~ ~~~~~~~~~~ ~~~~~~~~~~

Subject ~~~~~~~~~~ ~~~~~~~~~~ ~~~~~~~~~~ ~~~~~~~~~~ ~~~~~~~~~~ ~~~~~~~~~~

BCR-ABL1 AGCGAGGAGG ACTTCTCCTC TGGCCAGTCC AGCCGCGTGT CCCCAAGCCC CACCACCTAC

BCR AGCGAGGAGG ACTTCTCCTC TGGCCAGTCC AGCCGCGTGT CCCCAAGCCC CACCACCTAC

ABL ~~~~~~~~~~ ~~~~~~~~~~ ~~~~~~~~~~ ~~~~~~~~~~ ~~~~~~~~~~ ~~~~~~~~~~

....|....| ....|....| ....|....| ....|....| ....|....| ....|....|

1085 1095 1105 1115 1125 1135

P4 ~~~~~~~~~~ ~~~~~~~~~~ ~~~~~~~~~~ ~~~~~~~~~~ ~~~~~~~~~~ ~~~~~~~~~~

Subject ~~~~~~~~~~ ~~~~~~~~~~ ~~~~~~~~~~ ~~~~~~~~~~ ~~~~~~~~~~ ~~~~~~~~~~

BCR-ABL1 CGCATGTTCC GGGACAAAAG CCGCTCTCCC TCGCAGAACT CGCAACAGTC CTTCGACAGC

BCR CGCATGTTCC GGGACAAAAG CCGCTCTCCC TCGCAGAACT CGCAACAGTC CTTCGACAGC

ABL ~~~~~~~~~~ ~~~~~~~~~~ ~~~~~~~~~~ ~~~~~~~~~~ ~~~~~~~~~~ ~~~~~~~~~~

....|....| ....|....| ....|....| ....|....| ....|....| ....|....|

1145 1155 1165 1175 1185 1195

P4 ~~~~~~~~~~ ~~~~~~~~~~ ~~~~~~~~~~ ~~~~~~~~~~ ~~~~~~~~~~ ~~~~~~~~~~

Subject ~~~~~~~~~~ ~~~~~~~~~~ ~~~~~~~~~~ ~~~~~~~~~~ ~~~~~~~~~~ ~~~~~~~~~~

BCR-ABL1 AGCAGTCCCC CCACGCCGCA GTGCCATAAG CGGCACCGGC ACTGCCCGGT TGTCGTGTCC

BCR AGCAGTCCCC CCACGCCGCA GTGCCATAAG CGGCACCGGC ACTGCCCGGT TGTCGTGTCC

ABL ~~~~~~~~~~ ~~~~~~~~~~ ~~~~~~~~~~ ~~~~~~~~~~ ~~~~~~~~~~ ~~~~~~~~~~

....|....| ....|....| ....|....| ....|....| ....|....| ....|....|

1205 1215 1225 1235 1245 1255

P4 ~~~~~~~~~~ ~~~~~~~~~~ ~~~~~~~~~~ ~~~~~~~~~~ ~~~~~~~~~~ ~~~~~~~~~~

Subject ~~~~~~~~~~ ~~~~~~~~~~ ~~~~~~~~~~ ~~~~~~~~~~ ~~~~~~~~~~ ~~~~~~~~~~

BCR-ABL1 GAGGCCACCA TCGTGGGCGT CCGCAAGACC GGGCAGATCT GGCCCAACGA TGACGAGGGC

BCR GAGGCCACCA TCGTGGGCGT CCGCAAGACC GGGCAGATCT GGCCCAACGA TGACGAGGGC

ABL ~~~~~~~~~~ ~~~~~~~~~~ ~~~~~~~~~~ ~~~~~~~~~~ ~~~~~~~~~~ ~~~~~~~~~~

....|....| ....|....| ....|....| ....|....| ....|....| ....|....|

1265 1275 1285 1295 1305 1315

P4 ~~~~~~~~~~ ~~~~~~~~~~ ~~~~~~~~~~ ~~~~~~~~~~ ~~~~~~~~~~ ~~~~~~~~~~

Subject ~~~~~~~~~~ ~~~~~~~~~~ ~~~~~~~~~~ ~~~~~~~~~~ ~~~~~~~~~~ ~~~~~~~~~~

BCR-ABL1 GCCTTCCATG GAGACGCAGA TGGCTCGTTC GGAACACCAC CTGGATACGG CTGCGCTGCA

BCR GCCTTCCATG GAGACGCAGA TGGCTCGTTC GGAACACCAC CTGGATACGG CTGCGCTGCA

ABL ~~~~~~~~~~ ~~~~~~~~~~ ~~~~~~~~~~ ~~~~~~~~~~ ~~~~~~~~~~ ~~~~~~~~~~

....|....| ....|....| ....|....| ....|....| ....|....| ....|....|

1325 1335 1345 1355 1365 1375

P4 ~~~~~~~~~~ ~~~~~~~~~~ ~~~~~~~~~~ ~~~~~~~~~~ ~~~~~~~~~~ ~~~~~~~~~~

Subject ~~~~~~~~~~ ~~~~~~~~~~ ~~~~~~~~~~ ~~~~~~~~~~ ~~~~~~~~~~ ~~~~~~~~~~

BCR-ABL1 GACCGGGCAG AGGAGCAGCG CCGGCACCAA GATGGGCTGC CCTACATTGA TGACTCGCCC

BCR GACCGGGCAG AGGAGCAGCG CCGGCACCAA GATGGGCTGC CCTACATTGA TGACTCGCCC

ABL ~~~~~~~~~~ ~~~~~~~~~~ ~~~~~~~~~~ ~~~~~~~~~~ ~~~~~~~~~~ ~~~~~~~~~~

....|....| ....|....| ....|....| ....|....| ....|....| ....|....|

1385 1395 1405 1415 1425 1435

P4 ~~~~~~~~~~ ~~~~~~~~~~ ~~~~~~~~~~ ~~~~~~~~~~ ~~~~~~~~~~ ~~~~~~~~~~

Subject ~~~~~~~~~~ ~~~~~~~~~~ ~~~~~~~~~~ ~~~~~~~~~~ ~~~~~~~~~~ ~~~~~~~~~~

BCR-ABL1 TCCTCATCGC CCCACCTCAG CAGCAAGGGC AGGGGCAGCC GGGATGCGCT GGTCTCGGGA

BCR TCCTCATCGC CCCACCTCAG CAGCAAGGGC AGGGGCAGCC GGGATGCGCT GGTCTCGGGA

ABL ~~~~~~~~~~ ~~~~~~~~~~ ~~~~~~~~~~ ~~~~~~~~~~ ~~~~~~~~~~ ~~~~~~~~~~

....|....| ....|....| ....|....| ....|....| ....|....| ....|....|

1445 1455 1465 1475 1485 1495

P4 ~~~~~~~~~~ ~~~~~~~~~~ ~~~~~~~~~~ ~~~~~~~~~~ ~~~~~~~~~~ ~~~~~~~~~~

Subject ~~~~~~~~~~ ~~~~~~~~~~ ~~~~~~~~~~ ~~~~~~~~~~ ~~~~~~~~~~ ~~~~~~~~~~

BCR-ABL1 GCCCTGAAGT CCACTAAAGC GAGTGAGCTG GACTTGGAAA AGGGCTTGGA GATGAGAAAA

BCR GCCCTGAAGT CCACTAAAGC GAGTGAGCTG GACTTGGAAA AGGGCTTGGA GATGAGAAAA

ABL ~~~~~~~~~~ ~~~~~~~~~~ ~~~~~~~~~~ ~~~~~~~~~~ ~~~~~~~~~~ ~~~~~~~~~~

....|....| ....|....| ....|....| ....|....| ....|....| ....|....|

1505 1515 1525 1535 1545 1555

P4 ~~~~~~~~~~ ~~~~~~~~~~ ~~~~~~~~~~ ~~~~~~~~~~ ~~~~~~~~~~ ~~~~~~~~~~

Subject ~~~~~~~~~~ ~~~~~~~~~~ ~~~~~~~~~~ ~~~~~~~~~~ ~~~~~~~~~~ ~~~~~~~~~~

BCR-ABL1 TGGGTCCTGT CGGGAATCCT GGCTAGCGAG GAGACTTACC TGAGCCACCT GGAGGCACTG

BCR TGGGTCCTGT CGGGAATCCT GGCTAGCGAG GAGACTTACC TGAGCCACCT GGAGGCACTG

ABL ~~~~~~~~~~ ~~~~~~~~~~ ~~~~~~~~~~ ~~~~~~~~~~ ~~~~~~~~~~ ~~~~~~~~~~

....|....| ....|....| ....|....| ....|....| ....|....| ....|....|

1565 1575 1585 1595 1605 1615

P4 ~~~~~~~~~~ ~~~~~~~~~~ ~~~~~~~~~~ ~~~~~~~~~~ ~~~~~~~~~~ ~~~~~~~~~~

Subject ~~~~~~~~~~ ~~~~~~~~~~ ~~~~~~~~~~ ~~~~~~~~~~ ~~~~~~~~~~ ~~~~~~~~~~

BCR-ABL1 CTGCTGCCCA TGAAGCCTTT GAAAGCCGCT GCCACCACCT CTCAGCCGGT GCTGACGAGT

BCR CTGCTGCCCA TGAAGCCTTT GAAAGCCGCT GCCACCACCT CTCAGCCGGT GCTGACGAGT

ABL ~~~~~~~~~~ ~~~~~~~~~~ ~~~~~~~~~~ ~~~~~~~~~~ ~~~~~~~~~~ ~~~~~~~~~~

....|....| ....|....| ....|....| ....|....| ....|....| ....|....|

1625 1635 1645 1655 1665 1675

P4 ~~~~~~~~~~ ~~~~~~~~~~ ~~~~~~~~~~ ~~~~~~~~~~ ~~~~~~~~~~ ~~~~~~~~~~

Subject ~~~~~~~~~~ ~~~~~~~~~~ ~~~~~~~~~~ ~~~~~~~~~~ ~~~~~~~~~~ ~~~~~~~~~~

BCR-ABL1 CAGCAGATCG AGACCATCTT CTTCAAAGTG CCTGAGCTCT ACGAGATCCA CAAGGAGTCC

BCR CAGCAGATCG AGACCATCTT CTTCAAAGTG CCTGAGCTCT ACGAGATCCA CAAGGAGTCC

ABL ~~~~~~~~~~ ~~~~~~~~~~ ~~~~~~~~~~ ~~~~~~~~~~ ~~~~~~~~~~ ~~~~~~~~~~

....|....| ....|....| ....|....| ....|....| ....|....| ....|....|

1685 1695 1705 1715 1725 1735

P4 ~~~~~~~~~~ ~~~~~~~~~~ ~~~~~~~~~~ ~~~~~~~~~~ ~~~~~~~~~~ ~~~~~~~~~~

Subject ~~~~~~~~~~ ~~~~~~~~~~ ~~~~~~~~~~ ~~~~~~~~~~ ~~~~~~~~~~ ~~~~~~~~~~

BCR-ABL1 TATGATGGGC TCTTCCCCCG CGTGCAGCAG TGGAGCCACC AGCAGCGGGT GGGCGACCTC

BCR TATGATGGGC TCTTCCCCCG CGTGCAGCAG TGGAGCCACC AGCAGCGGGT GGGCGACCTC

ABL ~~~~~~~~~~ ~~~~~~~~~~ ~~~~~~~~~~ ~~~~~~~~~~ ~~~~~~~~~~ ~~~~~~~~~~

....|....| ....|....| ....|....| ....|....| ....|....| ....|....|

1745 1755 1765 1775 1785 1795

P4 ~~~~~~~~~~ ~~~~~~~~~~ ~~~~~~~~~~ ~~~~~~~~~~ ~~~~~~~~~~ ~~~~~~~~~~

Subject ~~~~~~~~~~ ~~~~~~~~~~ ~~~~~~~~~~ ~~~~~~~~~~ ~~~~~~~~~~ ~~~~~~~~~~

BCR-ABL1 TTCCAGAAGC TGGCCAGCCA GCTGGGTGTG TACCGGGCCT TCGTGGACAA CTACGGAGTT

BCR TTCCAGAAGC TGGCCAGCCA GCTGGGTGTG TACCGGGCCT TCGTGGACAA CTACGGAGTT

ABL ~~~~~~~~~~ ~~~~~~~~~~ ~~~~~~~~~~ ~~~~~~~~~~ ~~~~~~~~~~ ~~~~~~~~~~

....|....| ....|....| ....|....| ....|....| ....|....| ....|....|

1805 1815 1825 1835 1845 1855

P4 ~~~~~~~~~~ ~~~~~~~~~~ ~~~~~~~~~~ ~~~~~~~~~~ ~~~~~~~~~~ ~~~~~~~~~~

Subject ~~~~~~~~~~ ~~~~~~~~~~ ~~~~~~~~~~ ~~~~~~~~~~ ~~~~~~~~~~ ~~~~~~~~~~

BCR-ABL1 GCCATGGAAA TGGCTGAGAA GTGCTGTCAG GCCAATGCTC AGTTTGCAGA AATCTCCGAG

BCR GCCATGGAAA TGGCTGAGAA GTGCTGTCAG GCCAATGCTC AGTTTGCAGA AATCTCCGAG

ABL ~~~~~~~~~~ ~~~~~~~~~~ ~~~~~~~~~~ ~~~~~~~~~~ ~~~~~~~~~~ ~~~~~~~~~~

....|....| ....|....| ....|....| ....|....| ....|....| ....|....|

1865 1875 1885 1895 1905 1915

P4 ~~~~~~~~~~ ~~~~~~~~~~ ~~~~~~~~~~ ~~~~~~~~~~ ~~~~~~~~~~ ~~~~~~~~~~

Subject ~~~~~~~~~~ ~~~~~~~~~~ ~~~~~~~~~~ ~~~~~~~~~~ ~~~~~~~~~~ ~~~~~~~~~~

BCR-ABL1 AACCTGAGAG CCAGAAGCAA CAAAGATGCC AAGGATCCAA CGACCAAGAA CTCTCTGGAA

BCR AACCTGAGAG CCAGAAGCAA CAAAGATGCC AAGGATCCAA CGACCAAGAA CTCTCTGGAA

ABL ~~~~~~~~~~ ~~~~~~~~~~ ~~~~~~~~~~ ~~~~~~~~~~ ~~~~~~~~~~ ~~~~~~~~~~

....|....| ....|....| ....|....| ....|....| ....|....| ....|....|

1925 1935 1945 1955 1965 1975

P4 ~~~~~~~~~~ ~~~~~~~~~~ ~~~~~~~~~~ ~~~~~~~~~~ ~~~~~~~~~~ ~~~~~~~~~~

Subject ~~~~~~~~~~ ~~~~~~~~~~ ~~~~~~~~~~ ~~~~~~~~~~ ~~~~~~~~~~ ~~~~~~~~~~

BCR-ABL1 ACTCTGCTCT ACAAGCCTGT GGACCGTGTG ACGAGGAGCA CGCTGGTCCT CCATGACTTG

BCR ACTCTGCTCT ACAAGCCTGT GGACCGTGTG ACGAGGAGCA CGCTGGTCCT CCATGACTTG

ABL ~~~~~~~~~~ ~~~~~~~~~~ ~~~~~~~~~~ ~~~~~~~~~~ ~~~~~~~~~~ ~~~~~~~~~~

....|....| ....|....| ....|....| ....|....| ....|....| ....|....|

1985 1995 2005 2015 2025 2035

P4 ~~~~~~~~~~ ~~~~~~~~~~ ~~~~~~~~~~ ~~~~~~~~~~ ~~~~~~~~~~ ~~~~~~~~~~

Subject ~~~~~~~~~~ ~~~~~~~~~~ ~~~~~~~~~~ ~~~~~~~~~~ ~~~~~~~~~~ ~~~~~~~~~~

BCR-ABL1 CTGAAGCACA CTCCTGCCAG CCACCCTGAC CACCCCTTGC TGCAGGACGC CCTCCGCATC

BCR CTGAAGCACA CTCCTGCCAG CCACCCTGAC CACCCCTTGC TGCAGGACGC CCTCCGCATC

ABL ~~~~~~~~~~ ~~~~~~~~~~ ~~~~~~~~~~ ~~~~~~~~~~ ~~~~~~~~~~ ~~~~~~~~~~

....|....| ....|....| ....|....| ....|....| ....|....| ....|....|

2045 2055 2065 2075 2085 2095

P4 ~~~~~~~~~~ ~~~~~~~~~~ ~~~~~~~~~~ ~~~~~~~~~~ ~~~~~~~~~~ ~~~~~~~~~~

Subject ~~~~~~~~~~ ~~~~~~~~~~ ~~~~~~~~~~ ~~~~~~~~~~ ~~~~~~~~~~ ~~~~~~~~~~

BCR-ABL1 TCACAGAACT TCCTGTCCAG CATCAATGAG GAGATCACAC CCCGACGGCA GTCCATGACG

BCR TCACAGAACT TCCTGTCCAG CATCAATGAG GAGATCACAC CCCGACGGCA GTCCATGACG

ABL ~~~~~~~~~~ ~~~~~~~~~~ ~~~~~~~~~~ ~~~~~~~~~~ ~~~~~~~~~~ ~~~~~~~~~~

....|....| ....|....| ....|....| ....|....| ....|....| ....|....|

2105 2115 2125 2135 2145 2155

P4 ~~~~~~~~~~ ~~~~~~~~~~ ~~~~~~~~~~ ~~~~~~~~~~ ~~~~~~~~~~ ~~~~~~~~~~

Subject ~~~~~~~~~~ ~~~~~~~~~~ ~~~~~~~~~~ ~~~~~~~~~~ ~~~~~~~~~~ ~~~~~~~~~~

BCR-ABL1 GTGAAGAAGG GAGAGCACCG GCAGCTGCTG AAGGACAGCT TCATGGTGGA GCTGGTGGAG

BCR GTGAAGAAGG GAGAGCACCG GCAGCTGCTG AAGGACAGCT TCATGGTGGA GCTGGTGGAG

ABL ~~~~~~~~~~ ~~~~~~~~~~ ~~~~~~~~~~ ~~~~~~~~~~ ~~~~~~~~~~ ~~~~~~~~~~

....|....| ....|....| ....|....| ....|....| ....|....| ....|....|

2165 2175 2185 2195 2205 2215

P4 ~~~~~~~~~~ ~~~~~~~~~~ ~~~~~~~~~~ ~~~~~~~~~~ ~~~~~~~~~~ ~~~~~~~~~~

Subject ~~~~~~~~~~ ~~~~~~~~~~ ~~~~~~~~~~ ~~~~~~~~~~ ~~~~~~~~~~ ~~~~~~~~~~

BCR-ABL1 GGGGCCCGCA AGCTGCGGCA CGTCTTCCTG TTCACCGACC TGCTTCTCTG CACCAAGCTC

BCR GGGGCCCGCA AGCTGCGGCA CGTCTTCCTG TTCACCGACC TGCTTCTCTG CACCAAGCTC

ABL ~~~~~~~~~~ ~~~~~~~~~~ ~~~~~~~~~~ ~~~~~~~~~~ ~~~~~~~~~~ ~~~~~~~~~~

....|....| ....|....| ....|....| ....|....| ....|....| ....|....|

2225 2235 2245 2255 2265 2275

P4 ~~~~~~~~~~ ~~~~~~~~~~ ~~~~~~~~~~ ~~~~~~~~~~ ~~~~~~~~~~ ~~~~~~~~~~

Subject ~~~~~~~~~~ ~~~~~~~~~~ ~~~~~~~~~~ ~~~~~~~~~~ ~~~~~~~~~~ ~~~~~~~~~~

BCR-ABL1 AAGAAGCAGA GCGGAGGCAA AACGCAGCAG TATGACTGCA AATGGTACAT TCCGCTCACG

BCR AAGAAGCAGA GCGGAGGCAA AACGCAGCAG TATGACTGCA AATGGTACAT TCCGCTCACG

ABL ~~~~~~~~~~ ~~~~~~~~~~ ~~~~~~~~~~ ~~~~~~~~~~ ~~~~~~~~~~ ~~~~~~~~~~

....|....| ....|....| ....|....| ....|....| ....|....| ....|....|

2285 2295 2305 2315 2325 2335

P4 ~~~~~~~~~~ ~~~~~~~~~~ ~~~~~~~~~~ ~~~~~~~~~~ ~~~~~~~~~~ ~~~~~~~~~~

Subject ~~~~~~~~~~ ~~~~~~~~~~ ~~~~~~~~~~ ~~~~~~~~~~ ~~~~~~~~~~ ~~~~~~~~~~

BCR-ABL1 GATCTCAGCT TCCAGATGGT GGATGAACTG GAGGCAGTGC CCAACATCCC CCTGGTGCCC

BCR GATCTCAGCT TCCAGATGGT GGATGAACTG GAGGCAGTGC CCAACATCCC CCTGGTGCCC

ABL ~~~~~~~~~~ ~~~~~~~~~~ ~~~~~~~~~~ ~~~~~~~~~~ ~~~~~~~~~~ ~~~~~~~~~~

....|....| ....|....| ....|....| ....|....| ....|....| ....|....|

2345 2355 2365 2375 2385 2395

P4 ~~~~~~~~~~ ~~~~~~~~~~ ~~~~~~~~~~ ~~~~~~~~~~ ~~~~~~~~~~ ~~~~~~~~~~

Subject ~~~~~~~~~~ ~~~~~~~~~~ ~~~~~~~~~~ ~~~~~~~~~~ ~~~~~~~~~~ ~~~~~~~~~~

BCR-ABL1 GATGAGGAGC TGGACGCTTT GAAGATCAAG ATCTCCCAGA TCAAGAGTGA CATCCAGAGA

BCR GATGAGGAGC TGGACGCTTT GAAGATCAAG ATCTCCCAGA TCAAGAGTGA CATCCAGAGA

ABL ~~~~~~~~~~ ~~~~~~~~~~ ~~~~~~~~~~ ~~~~~~~~~~ ~~~~~~~~~~ ~~~~~~~~~~

....|....| ....|....| ....|....| ....|....| ....|....| ....|....|

2405 2415 2425 2435 2445 2455

P4 ~~~~~~~~~~ ~~~~~~~~~~ ~~~~~~~~~~ ~~~~~~~~~~ ~~~~~~~~~~ ~~~~~~~~~~

Subject ~~~~~~~~~~ ~~~~~~~~~~ ~~~~~~~~~~ ~~~~~~~~~~ ~~~~~~~~~~ ~~~~~~~~~~

BCR-ABL1 GAGAAGAGGG CGAACAAGGG CAGCAAGGCT ACGGAGAGGC TGAAGAAGAA GCTGTCGGAG

BCR GAGAAGAGGG CGAACAAGGG CAGCAAGGCT ACGGAGAGGC TGAAGAAGAA GCTGTCGGAG

ABL ~~~~~~~~~~ ~~~~~~~~~~ ~~~~~~~~~~ ~~~~~~~~~~ ~~~~~~~~~~ ~~~~~~~~~~

....|....| ....|....| ....|....| ....|....| ....|....| ....|....|

2465 2475 2485 2495 2505 2515

P4 ~~~~~~~~~~ ~~~~~~~~~~ ~~~~~~~~~~ ~~~~~~~~~~ ~~~~~GNNNN NNNNNNNNNA

Subject ~~~~~~~~~~ ~~~~~~~~~~ ~~~~~~~~~~ ~~~~~~~~~~ ~~~~~CACGG CANGAG~~~~

BCR-ABL1 CAGGAGTCAC TGCTGCTGCT TATGTCTCCC AGCATGGCCT TCAGGGTGCA CAGCCGCAAC

BCR CAGGAGTCAC TGCTGCTGCT TATGTCTCCC AGCATGGCCT TCAGGGTGCA CAGCCGCAAC

ABL ~~~~~~~~~~ ~~~~~~~~~~ ~~~~~~~~~~ ~~~~~~~~~~ ~~~~~~~~~~ ~~~~~~~~~~

....|....| ....|....| ....|....| ....|....| ....|....| ....|....|

2525 2535 2545 2555 2565 2575

P4 CGGCAGAGTT ACACGTTCCT GATCTCCTCT GACTATGAGC GTGCAGAGTG GAGGGAGAAC

Subject ~~~~~~~~TT ACACGTTCCT GATCTCCTCT GACTATGAGC GTGCAGAGTG GAGGGAGAAC

BCR-ABL1 GGCAAGAGTT ACACGTTCCT GATCTCCTCT GACTATGAGC GTGCAGAGTG GAGGGAGAAC

BCR GGCAAGAGTT ACACGTTCCT GATCTCCTCT GACTATGAGC GTGCAGAGTG GAGGGAGAAC

ABL ~~~~~~~~~~ ~~~~~~~~~~ ~~~~~~~~~~ ~~~~~~~~~~ ~~~~~~~~~~ ~~~~~~~~~~

....|....| ....|....| ....|....| ....|....| ....|....| ....|....|

2585 2595 2605 2615 2625 2635

P4 ATCCGGGAGC AGCAGAAGAA GTGTTTCAGA AGCTTCTCCC TGACATCCGT GGAGCTGCAG

Subject ATCCGGGAGC AGCAGAAGAA GTGTTTCAGA AGCTTCTCCC TGACATCCGT GGAGCTGCAG

BCR-ABL1 ATCCGGGAGC AGCAGAAGAA GTGTTTCAGA AGCTTCTCCC TGACATCCGT GGAGCTGCAG

BCR ATCCGGGAGC AGCAGAAGAA GTGTTTCAGA AGCTTCTCCC TGACATCCGT GGAGCTGCAG

ABL ~~~~~~~~~~ ~~~~~~~~~~ ~~~~~~~~~~ ~~~~~~~~~~ ~~~~~~~~~~ ~~~~~~~~~~

....|....| ....|....| ....|....| ....|....| ....|....| ....|....|

2645 2655 2665 2675 2685 2695

P4 ATGCTGACCA ACTCGTGTGT GAAACTCCAG ACTGTCCACA GCATTCCGCT GACCATCAAT

Subject ATGCTGACCA ACTCGTGTGT GAAACTCCAG ACTGTCCACA GCATTCCGCT GACCATCAAT

BCR-ABL1 ATGCTGACCA ACTCGTGTGT GAAACTCCAG ACTGTCCACA GCATTCCGCT GACCATCAAT

BCR ATGCTGACCA ACTCGTGTGT GAAACTCCAG ACTGTCCACA GCATTCCGCT GACCATCAAT

ABL ~~~~~~~~~~ ~~~~~~~~~~ ~~~~~~~~~~ ~~~~~~~~~~ ~~~~~~~~~~ ~~~~~~~~~~

....|....| ....|....| ....|....| ....|....| ....|....| ....|....|

2705 2715 2725 2735 2745 2755

P4 AAGGAAGA~~ ~~~~~~~~~~ ~~~~~~~~~~ ~~~~~~~~~~ ~~~~~~~~~~ ~~~~~~~~~~

Subject AAGGAAGA~~ ~~~~~~~~~~ ~~~~~~~~~~ ~~~~~~~~~~ ~~~~~~~~~~ ~~~~~~~~~~

BCR-ABL1 AAGGAAGATG ATGAGTCTCC GGGGCTCTAT GGGTTTCTGA ATGTCATCGT CCACTCAGCC

BCR AAGGAAGATG ATGAGTCTCC GGGGCTCTAT GGGTTTCTGA ATGTCATCGT CCACTCAGCC

ABL ~~~~~~~~~~ ~~~~~~~~~~ ~~~~~~~~~~ ~~~~~~~~~~ ~~~~~~~~~~ ~~~~~~~~~~

....|....| ....|....| ....|....| ....|....| ....|....| ....|....|

2765 2775 2785 2795 2805 2815

P4 ~~~~~~~~~~ ~~~~~~~~~~ ~~~AGCCCTT CAGCGGCCAG TAGCATCTGA CTTTGAGCCT

Subject ~~~~~~~~~~ ~~~~~~~~~~ ~~~AGACCTT CATCGGGCAG TATCATCTGA CTTTGATGCT

BCR-ABL1 ACTGGATTTA AGCAGAGTTC AAAAGCCCTT CAGCGGCCAG TAGCATCTGA CTTTGAGCCT

BCR ACTGGATTTA AGCAGAGTTC AAAT...... .......... .......... ..........

ABL ~~~~~~~~~~ ~~~~~~~~~~ ~~~AGCCCTT CAGCGGCCAG TAGCATCTGA CTTTGAGCCT

....|....| ....|....| ....|....| ....|....| ....|....| ....|....|

2825 2835 2845 2855 2865 2875

P4 CAGGGTCTGA GTGAAGCCGC TCGTTGGAAC TCCAAGGAAA ACCTTCTCGC TGGACCCAGT

Subject CACGGTCTGA CTGAAGCCGC TCGTTGGAAC ACCAAGGAAA ACCTTCTCGC TGGACCCAGT

BCR-ABL1 CAGGGTCTGA GTGAAGCCGC TCGTTGGAAC TCCAAGGAAA ACCTTCTCGC TGGACCCAGT

BCR .......... .......... .......... .......... .......... ..........

ABL CAGGGTCTGA GTGAAGCCGC TCGTTGGAAC TCCAAGGAAA ACCTTCTCGC TGGACCCAGT

....|....| ....|....| ....|....| ....|....| ....|....| ....|....|

2885 2895 2905 2915 2925 2935

P4 GAAAATGACC CCAACCTTTT CGTTGCACTG TATGATTTTG TGGCCAGTGG AGATAACACT

Subject GAAAATGACC CCCCCCTTTT CCTTACACTG TATGATTTTG TGGCCNCCGG AGATAACACT

BCR-ABL1 GAAAATGACC CCAACCTTTT CGTTGCACTG TATGATTTTG TGGCCAGTGG AGATAACACT

BCR .......... .......... .......... .......... .......... ..........

ABL GAAAATGACC CCAACCTTTT CGTTGCACTG TATGATTTTG TGGCCAGTGG AGATAACACT

....|....| ....|....| ....|....| ....|....| ....|....| ....|....|

2945 2955 2965 2975 2985 2995

P4 CTAAGCATAA CTAAAGGTGA AAAGCTCCGG GTCTTAGGCT ATAATCACAA TGGGGAATGG

Subject CTAAGCATAA CTAAAGGTGA AAAGCTCCGG GTCTTAGGCT ATAATCACAA TGGGGAATGG

BCR-ABL1 CTAAGCATAA CTAAAGGTGA AAAGCTCCGG GTCTTAGGCT ATAATCACAA TGGGGAATGG

BCR .......... .......... .......... .......... .......... ..........

ABL CTAAGCATAA CTAAAGGTGA AAAGCTCCGG GTCTTAGGCT ATAATCACAA TGGGGAATGG

....|....| ....|....| ....|....| ....|....| ....|....| ....|....|

3005 3015 3025 3035 3045 3055

P4 TGTGAAGCCC AAACCAAAAA TGGCCAAGGC TGGGTCCCAA GCAACTACAT CACGCCAGTC

Subject TGTGAAGCCC AAACCAAAAA TGGCCAAGGC TGGGACCCAA GCAACTACAT CNNNCCAGTC

BCR-ABL1 TGTGAAGCCC AAACCAAAAA TGGCCAAGGC TGGGTCCCAA GCAACTACAT CACGCCAGTC

BCR .......... .......... .......... .......... .......... ..........

ABL TGTGAAGCCC AAACCAAAAA TGGCCAAGGC TGGGTCCCAA GCAACTACAT CACGCCAGTC

....|....| ....|....| ....|....| ....|....| ....|....| ....|....|

3065 3075 3085 3095 3105 3115

P4 AACAGTCTGG ANAAACACTC CTGGTACCAT GGGCCTGTGT CCCGCNNTGC CNNTGANTAT

Subject AACAGTCTGG AAAAACACTC CTGGNACCAT GGGCCTGTGT CCNGNNNNNN CNNTNANNNT

BCR-ABL1 AACAGTCTGG AGAAACACTC CTGGTACCAT GGGCCTGTGT CCCGCAATGC CGCTGAGTAT

BCR .......... .......... .......... .......... .......... ..........

ABL AACAGTCTGG AGAAACACTC CTGGTACCAT GGGCCTGTGT CCCGCAATGC CGCTGAGTAT

....|....| ....|....| ....|....| ....|....| ....|....| ....|....|

3125 3135 3145 3155 3165 3175

P4 CTGCTGAGCA GCGGGATCAA TGNNNNNTTC TTGGANTGGT ACCATGGGCC TGTGTCCCGC

Subject NTGNTGACCA CCGGGATCAN TGNNNNNNTN CNNTNNGNNT GGTACCATGG GCCTGTGTCC

BCR-ABL1 CTGCTGAGCA GCGGGATCAA TGGCAGCTTC TTGGTGCGTG AGAGTGAGAG CAGTCCTGGC

BCR .......... .......... .......... .......... .......... ..........

ABL CTGCTGAGCA GCGGGATCAA TGGCAGCTTC TTGGTGCGTG AGAGTGAGAG CAGTCCTGGC

....|....| ....|....| ....|....| ....|....| ....|....| ....|....|

3185 3195 3205 3215 3225 3235

P4 AATGCCGCTG AGTATCTGCT GAGCAGCGGG ATCAATGNNN NCCTTCTTGG N.........

Subject CGCAATGCCN CTGANTATCT GCTGAGCAGC GGGATCAATG NNNNCCNTTC TTGGA.....

BCR-ABL1 CAGAGGTCCA TCTCGCTGAG ATACGAAGGG AGGGTGTACC ATTACAGGAT CAACACTGCT

BCR .......... .......... .......... .......... .......... ..........

ABL CAGAGGTCCA TCTCGCTGAG ATACGAAGGG AGGGTGTACC ATTACAGGAT CAACACTGCT

....|....| ....|....| ....|....| ....|....| ....|....| ....|....|

3245 3255 3265 3275 3285 3295

P4 .......... .......... .......... .......... .......... ..........

Subject .......... .......... .......... .......... .......... ..........

BCR-ABL1 TCTGATGGCA AGCTCTACGT CTCCTCCGAG AGCCGCTTCA ACACCCTGGC CGAGTTGGTT

BCR .......... .......... .......... .......... .......... ..........

ABL TCTGATGGCA AGCTCTACGT CTCCTCCGAG AGCCGCTTCA ACACCCTGGC CGAGTTGGTT

....|....| ....|....| ....|....| ....|....| ....|....| ....|....|

3305 3315 3325 3335 3345 3355

P4 .......... .......... .......... .......... .......... ..........

Subject .......... .......... .......... .......... .......... ..........

BCR-ABL1 CATCATCATT CAACGGTGGC CGACGGGCTC ATCACCACGC TCCATTATCC AGCCCCAAAG

BCR .......... .......... .......... .......... .......... ..........

ABL CATCATCATT CAACGGTGGC CGACGGGCTC ATCACCACGC TCCATTATCC AGCCCCAAAG

....|....| ....|....| ....|....| ....|....| ....|....| ....|....|

3365 3375 3385 3395 3405 3415

P4 .......... .......... .......... .......... .......... ..........

Subject .......... .......... .......... .......... .......... ..........

BCR-ABL1 CGCAACAAGC CCACTGTCTA TGGTGTGTCC CCCAACTACG ACAAGTGGGA GATGGAACGC

BCR .......... .......... .......... .......... .......... ..........

ABL CGCAACAAGC CCACTGTCTA TGGTGTGTCC CCCAACTACG ACAAGTGGGA GATGGAACGC

....|....| ....|....| ....|....| ....|....| ....|....| ....|....|

3425 3435 3445 3455 3465 3475

P4 .......... .......... .......... .......... .......... ..........

Subject .......... .......... .......... .......... .......... ..........

BCR-ABL1 ACGGACATCA CCATGAAGCA CAAGCTGGGC GGGGGCCAGT ACGGGGAGGT GTACGAGGGC

BCR .......... .......... .......... .......... .......... ..........

ABL ACGGACATCA CCATGAAGCA CAAGCTGGGC GGGGGCCAGT ACGGGGAGGT GTACGAGGGC

....|....| ....|....| ....|....| ....|....| ....|....| ....|....|

3485 3495 3505 3515 3525 3535

P4 .......... .......... .......... .......... .......... ..........

Subject .......... .......... .......... .......... .......... ..........

BCR-ABL1 GTGTGGAAGA AATACAGCCT GACGGTGGCC GTGAAGACCT TGAAGGAGGA CACCATGGAG

BCR .......... .......... .......... .......... .......... ..........

ABL GTGTGGAAGA AATACAGCCT GACGGTGGCC GTGAAGACCT TGAAGGAGGA CACCATGGAG

....|....| ....|....| ....|....| ....|....| ....|....| ....|....|

3545 3555 3565 3575 3585 3595

P4 .......... .......... .......... .......... .......... ..........

Subject .......... .......... .......... .......... .......... ..........

BCR-ABL1 GTGGAAGAGT TCTTGAAAGA AGCTGCAGTC ATGAAAGAGA TCAAACACCC TAACCTGGTG

BCR .......... .......... .......... .......... .......... ..........

ABL GTGGAAGAGT TCTTGAAAGA AGCTGCAGTC ATGAAAGAGA TCAAACACCC TAACCTGGTG

....|....| ....|....| ....|....| ....|....| ....|....| ....|....|

3605 3615 3625 3635 3645 3655

P4 .......... .......... .......... .......... .......... ..........

Subject .......... .......... .......... .......... .......... ..........

BCR-ABL1 CAGCTCCTTG GGGTCTGCAC CCGGGAGCCC CCGTTCTATA TCATCACTGA GTTCATGACC

BCR .......... .......... .......... .......... .......... ..........

ABL CAGCTCCTTG GGGTCTGCAC CCGGGAGCCC CCGTTCTATA TCATCACTGA GTTCATGACC

....|....| ....|....| ....|....| ....|....| ....|....| ....|....|

3665 3675 3685 3695 3705 3715

P4 .......... .......... .......... .......... .......... ..........

Subject .......... .......... .......... .......... .......... ..........

BCR-ABL1 TACGGGAACC TCCTGGACTA CCTGAGGGAG TGCAACCGGC AGGAGGTGAA CGCCGTGGTG

BCR .......... .......... .......... .......... .......... ..........

ABL TACGGGAACC TCCTGGACTA CCTGAGGGAG TGCAACCGGC AGGAGGTGAA CGCCGTGGTG

....|....| ....|....| ....|....| ....|....| ....|....| ....|....|

3725 3735 3745 3755 3765 3775

P4 .......... .......... .......... .......... .......... ..........

Subject .......... .......... .......... .......... .......... ..........

BCR-ABL1 CTGCTGTACA TGGCCACTCA GATCTCGTCA GCCATGGAGT ACCTGGAGAA GAAAAACTTC

BCR .......... .......... .......... .......... .......... ..........

ABL CTGCTGTACA TGGCCACTCA GATCTCGTCA GCCATGGAGT ACCTGGAGAA GAAAAACTTC

....|....| ....|....| ....|....| ....|....| ....|....| ....|....|

3785 3795 3805 3815 3825 3835

P4 .......... .......... .......... .......... .......... ..........

Subject .......... .......... .......... .......... .......... ..........

BCR-ABL1 ATCCACAGAG ATCTTGCTGC CCGAAACTGC CTGGTAGGGG AGAACCACTT GGTGAAGGTA

BCR .......... .......... .......... .......... .......... ..........

ABL ATCCACAGAG ATCTTGCTGC CCGAAACTGC CTGGTAGGGG AGAACCACTT GGTGAAGGTA

....|....| ....|....| ....|....| ....|....| ....|....| ....|....|

3845 3855 3865 3875 3885 3895

P4 .......... .......... .......... .......... .......... ..........

Subject .......... .......... .......... .......... .......... ..........

BCR-ABL1 GCTGATTTTG GCCTGAGCAG GTTGATGACA GGGGACACCT ACACAGCCCA TGCTGGAGCC

BCR .......... .......... .......... .......... .......... ..........

ABL GCTGATTTTG GCCTGAGCAG GTTGATGACA GGGGACACCT ACACAGCCCA TGCTGGAGCC

....|....| ....|....| ....|....| ....|....| ....|....| ....|....|

3905 3915 3925 3935 3945 3955

P4 .......... .......... .......... .......... .......... ..........

Subject .......... .......... .......... .......... .......... ..........

BCR-ABL1 AAGTTCCCCA TCAAATGGAC TGCACCCGAG AGCCTGGCCT ACAACAAGTT CTCCATCAAG

BCR .......... .......... .......... .......... .......... ..........

ABL AAGTTCCCCA TCAAATGGAC TGCACCCGAG AGCCTGGCCT ACAACAAGTT CTCCATCAAG

....|....| ....|....| ....|....| ....|....| ....|....| ....|....|

3965 3975 3985 3995 4005 4015

P4 .......... .......... .......... .......... .......... ..........

Subject .......... .......... .......... .......... .......... ..........

BCR-ABL1 TCCGACGTCT GGGCATTTGG AGTATTGCTT TGGGAAATTG CTACCTATGG CATGTCCCCT

BCR .......... .......... .......... .......... .......... ..........

ABL TCCGACGTCT GGGCATTTGG AGTATTGCTT TGGGAAATTG CTACCTATGG CATGTCCCCT

....|....| ....|....| ....|....| ....|....| ....|....| ....|....|

4025 4035 4045 4055 4065 4075

P4 .......... .......... .......... .......... .......... ..........

Subject .......... .......... .......... .......... .......... ..........

BCR-ABL1 TACCCGGGAA TTGACCTGTC CCAGGTGTAT GAGCTGCTAG AGAAGGACTA CCGCATGGAG

BCR .......... .......... .......... .......... .......... ..........

ABL TACCCGGGAA TTGACCTGTC CCAGGTGTAT GAGCTGCTAG AGAAGGACTA CCGCATGGAG

....|....| ....|....| ....|....| ....|....| ....|....| ....|....|

4085 4095 4105 4115 4125 4135

P4 .......... .......... .......... .......... .......... ..........

Subject .......... .......... .......... .......... .......... ..........

BCR-ABL1 CGCCCAGAAG GCTGCCCAGA GAAGGTCTAT GAACTCATGC GAGCATGTTG GCAGTGGAAT

BCR .......... .......... .......... .......... .......... ..........

ABL CGCCCAGAAG GCTGCCCAGA GAAGGTCTAT GAACTCATGC GAGCATGTTG GCAGTGGAAT

....|....| ....|....| ....|....| ....|....| ....|....| ....|....|

4145 4155 4165 4175 4185 4195

P4 .......... .......... .......... .......... .......... ..........

Subject .......... .......... .......... .......... .......... ..........

BCR-ABL1 CCCTCTGACC GGCCCTCCTT TGCTGAAATC CACCAAGCCT TTGAAACAAT GTTCCAGGAA

BCR .......... .......... .......... .......... .......... ..........

ABL CCCTCTGACC GGCCCTCCTT TGCTGAAATC CACCAAGCCT TTGAAACAAT GTTCCAGGAA

....|....| ....|....| ....|....| ....|....| ....|....| ....|....|

4205 4215 4225 4235 4245 4255

P4 .......... .......... .......... .......... .......... ..........

Subject .......... .......... .......... .......... .......... ..........

BCR-ABL1 TCCAGTATCT CAGACGAAGT GGAAAAGGAG CTGGGGAAAC AAGGCGTCCG TGGGGCTGTG

BCR .......... .......... .......... .......... .......... ..........

ABL TCCAGTATCT CAGACGAAGT GGAAAAGGAG CTGGGGAAAC AAGGCGTCCG TGGGGCTGTG

....|....| ....|....| ....|....| ....|....| ....|....| ....|....|

4265 4275 4285 4295 4305 4315

P4 .......... .......... .......... .......... .......... ..........

Subject .......... .......... .......... .......... .......... ..........

BCR-ABL1 AGTACCTTGC TGCAGGCCCC AGAGCTGCCC ACCAAGACGA GGACCTCCAG GAGAGCTGCA

BCR .......... .......... .......... .......... .......... ..........

ABL AGTACCTTGC TGCAGGCCCC AGAGCTGCCC ACCAAGACGA GGACCTCCAG GAGAGCTGCA

....|....| ....|....| ....|....| ....|....| ....|....| ....|....|

4325 4335 4345 4355 4365 4375

P4 .......... .......... .......... .......... .......... ..........

Subject .......... .......... .......... .......... .......... ..........

BCR-ABL1 GAGCACAGAG ACACCACTGA CGTGCCTGAG ATGCCTCACT CCAAGGGCCA GGGAGAGAGC

BCR .......... .......... .......... .......... .......... ..........

ABL GAGCACAGAG ACACCACTGA CGTGCCTGAG ATGCCTCACT CCAAGGGCCA GGGAGAGAGC

....|....| ....|....| ....|....| ....|....| ....|....| ....|....|

4385 4395 4405 4415 4425 4435

P4 .......... .......... .......... .......... .......... ..........

Subject .......... .......... .......... .......... .......... ..........

BCR-ABL1 GATCCTCTGG ACCATGAGCC TGCCGTGTCT CCATTGCTCC CTCGAAAAGA GCGAGGTCCC

BCR .......... .......... .......... .......... .......... ..........

ABL GATCCTCTGG ACCATGAGCC TGCCGTGTCT CCATTGCTCC CTCGAAAAGA GCGAGGTCCC

....|....| ....|....| ....|....| ....|....| ....|....| ....|....|

4445 4455 4465 4475 4485 4495

P4 .......... .......... .......... .......... .......... ..........

Subject .......... .......... .......... .......... .......... ..........

BCR-ABL1 CCGGAGGGCG GCCTGAATGA AGATGAGCGC CTTCTCCCCA AAGACAAAAA GACCAACTTG

BCR .......... .......... .......... .......... .......... ..........

ABL CCGGAGGGCG GCCTGAATGA AGATGAGCGC CTTCTCCCCA AAGACAAAAA GACCAACTTG

....|....| ....|....| ....|....| ....|....| ....|....| ....|....|

4505 4515 4525 4535 4545 4555

P4 .......... .......... .......... .......... .......... ..........

Subject .......... .......... .......... .......... .......... ..........

BCR-ABL1 TTCAGCGCCT TGATCAAGAA GAAGAAGAAG ACAGCCCCAA CCCCTCCCAA ACGCAGCAGC

BCR .......... .......... .......... .......... .......... ..........

ABL TTCAGCGCCT TGATCAAGAA GAAGAAGAAG ACAGCCCCAA CCCCTCCCAA ACGCAGCAGC

....|....| ....|....| ....|....| ....|....| ....|....| ....|....|

4565 4575 4585 4595 4605 4615

P4 .......... .......... .......... .......... .......... ..........

Subject .......... .......... .......... .......... .......... ..........

BCR-ABL1 TCCTTCCGGG AGATGGACGG CCAGCCGGAG CGCAGAGGGG CCGGCGAGGA AGAGGGCCGA

BCR .......... .......... .......... .......... .......... ..........

ABL TCCTTCCGGG AGATGGACGG CCAGCCGGAG CGCAGAGGGG CCGGCGAGGA AGAGGGCCGA

....|....| ....|....| ....|....| ....|....| ....|....| ....|....|

4625 4635 4645 4655 4665 4675

P4 .......... .......... .......... .......... .......... ..........

Subject .......... .......... .......... .......... .......... ..........

BCR-ABL1 GACATCAGCA ACGGGGCACT GGCTTTCACC CCCTTGGACA CAGCTGACCC AGCCAAGTCC

BCR .......... .......... .......... .......... .......... ..........

ABL GACATCAGCA ACGGGGCACT GGCTTTCACC CCCTTGGACA CAGCTGACCC AGCCAAGTCC

....|....| ....|....| ....|....| ....|....| ....|....| ....|....|

4685 4695 4705 4715 4725 4735

P4 .......... .......... .......... .......... .......... ..........

Subject .......... .......... .......... .......... .......... ..........

BCR-ABL1 CCAAAGCCCA GCAATGGGGC TGGGGTCCCC AATGGAGCCC TCCGGGAGTC CGGGGGCTCA

BCR .......... .......... .......... .......... .......... ..........

ABL CCAAAGCCCA GCAATGGGGC TGGGGTCCCC AATGGAGCCC TCCGGGAGTC CGGGGGCTCA

....|....| ....|....| ....|....| ....|....| ....|....| ....|....|

4745 4755 4765 4775 4785 4795

P4 .......... .......... .......... .......... .......... ..........

Subject .......... .......... .......... .......... .......... ..........

BCR-ABL1 GGCTTCCGGT CTCCCCACCT GTGGAAGAAG TCCAGCACGC TGACCAGCAG CCGCCTAGCC

BCR .......... .......... .......... .......... .......... ..........

ABL GGCTTCCGGT CTCCCCACCT GTGGAAGAAG TCCAGCACGC TGACCAGCAG CCGCCTAGCC

....|....| ....|....| ....|....| ....|....| ....|....| ....|....|

4805 4815 4825 4835 4845 4855

P4 .......... .......... .......... .......... .......... ..........

Subject .......... .......... .......... .......... .......... ..........

BCR-ABL1 ACCGGCGAGG AGGAGGGCGG TGGCAGCTCC AGCAAGCGCT TCCTGCGCTC TTGCTCCGCC

BCR .......... .......... .......... .......... .......... ..........

ABL ACCGGCGAGG AGGAGGGCGG TGGCAGCTCC AGCAAGCGCT TCCTGCGCTC TTGCTCCGCC

....|....| ....|....| ....|....| ....|....| ....|....| ....|....|

4865 4875 4885 4895 4905 4915

P4 .......... .......... .......... .......... .......... ..........

Subject .......... .......... .......... .......... .......... ..........

BCR-ABL1 TCCTGCGTTC CCCATGGGGC CAAGGACACG GAGTGGAGGT CAGTCACGCT GCCTCGGGAC

BCR .......... .......... .......... .......... .......... ..........

ABL TCCTGCGTTC CCCATGGGGC CAAGGACACG GAGTGGAGGT CAGTCACGCT GCCTCGGGAC

....|....| ....|....| ....|....| ....|....| ....|....| ....|....|

4925 4935 4945 4955 4965 4975

P4 .......... .......... .......... .......... .......... ..........

Subject .......... .......... .......... .......... .......... ..........

BCR-ABL1 TTGCAGTCCA CGGGAAGACA GTTTGACTCG TCCACATTTG GAGGGCACAA AAGTGAGAAG

BCR .......... .......... .......... .......... .......... ..........

ABL TTGCAGTCCA CGGGAAGACA GTTTGACTCG TCCACATTTG GAGGGCACAA AAGTGAGAAG

....|....| ....|....| ....|....| ....|....| ....|....| ....|....|

4985 4995 5005 5015 5025 5035

P4 .......... .......... .......... .......... .......... ..........

Subject .......... .......... .......... .......... .......... ..........

BCR-ABL1 CCGGCTCTGC CTCGGAAGAG GGCAGGGGAG AACAGGTCTG ACCAGGTGAC CCGAGGCACA

BCR .......... .......... .......... .......... .......... ..........

ABL CCGGCTCTGC CTCGGAAGAG GGCAGGGGAG AACAGGTCTG ACCAGGTGAC CCGAGGCACA

....|....| ....|....| ....|....| ....|....| ....|....| ....|....|

5045 5055 5065 5075 5085 5095

P4 .......... .......... .......... .......... .......... ..........

Subject .......... .......... .......... .......... .......... ..........

BCR-ABL1 GTAACGCCTC CCCCCAGGCT GGTGAAAAAG AATGAGGAAG CTGCTGATGA GGTCTTCAAA

BCR .......... .......... .......... .......... .......... ..........

ABL GTAACGCCTC CCCCCAGGCT GGTGAAAAAG AATGAGGAAG CTGCTGATGA GGTCTTCAAA

....|....| ....|....| ....|....| ....|....| ....|....| ....|....|

5105 5115 5125 5135 5145 5155

P4 .......... .......... .......... .......... .......... ..........

Subject .......... .......... .......... .......... .......... ..........

BCR-ABL1 GACATCATGG AGTCCAGCCC GGGCTCCAGC CCGCCCAACC TGACTCCAAA ACCCCTCCGG

BCR .......... .......... .......... .......... .......... ..........

ABL GACATCATGG AGTCCAGCCC GGGCTCCAGC CCGCCCAACC TGACTCCAAA ACCCCTCCGG

....|....| ....|....| ....|....| ....|....| ....|....| ....|....|

5165 5175 5185 5195 5205 5215

P4 .......... .......... .......... .......... .......... ..........

Subject .......... .......... .......... .......... .......... ..........

BCR-ABL1 CGGCAGGTCA CCGTGGCCCC TGCCTCGGGC CTCCCCCACA AGGAAGAAGC TGAAAAGGGC

BCR .......... .......... .......... .......... .......... ..........

ABL CGGCAGGTCA CCGTGGCCCC TGCCTCGGGC CTCCCCCACA AGGAAGAAGC TGAAAAGGGC

....|....| ....|....| ....|....| ....|....| ....|....| ....|....|

5225 5235 5245 5255 5265 5275

P4 .......... .......... .......... .......... .......... ..........

Subject .......... .......... .......... .......... .......... ..........

BCR-ABL1 AGTGCCTTAG GGACCCCTGC TGCAGCTGAG CCAGTGACCC CCACCAGCAA AGCAGGCTCA

BCR .......... .......... .......... .......... .......... ..........

ABL AGTGCCTTAG GGACCCCTGC TGCAGCTGAG CCAGTGACCC CCACCAGCAA AGCAGGCTCA

....|....| ....|....| ....|....| ....|....| ....|....| ....|....|

5285 5295 5305 5315 5325 5335

P4 .......... .......... .......... .......... .......... ..........

Subject .......... .......... .......... .......... .......... ..........

BCR-ABL1 GGTGCACCAG GGGGCACCAG CAAGGGCCCC GCCGAGGAGT CCAGAGTGAG GAGGCACAAG

BCR .......... .......... .......... .......... .......... ..........

ABL GGTGCACCAG GGGGCACCAG CAAGGGCCCC GCCGAGGAGT CCAGAGTGAG GAGGCACAAG

....|....| ....|....| ....|....| ....|....| ....|....| ....|....|

5345 5355 5365 5375 5385 5395

P4 .......... .......... .......... .......... .......... ..........

Subject .......... .......... .......... .......... .......... ..........

BCR-ABL1 CACTCCTCTG AGTCGCCAGG GAGGGACAAG GGGAAATTGT CCAGGCTCAA ACCTGCCCCG

BCR .......... .......... .......... .......... .......... ..........

ABL CACTCCTCTG AGTCGCCAGG GAGGGACAAG GGGAAATTGT CCAGGCTCAA ACCTGCCCCG

....|....| ....|....| ....|....| ....|....| ....|....| ....|....|

5405 5415 5425 5435 5445 5455

P4 .......... .......... .......... .......... .......... ..........

Subject .......... .......... .......... .......... .......... ..........

BCR-ABL1 CCGCCCCCAC CAGCAGCCTC TGCAGGGAAG GCTGGAGGAA AGCCCTCGCA GAGCCCGAGC

BCR .......... .......... .......... .......... .......... ..........

ABL CCGCCCCCAC CAGCAGCCTC TGCAGGGAAG GCTGGAGGAA AGCCCTCGCA GAGCCCGAGC

....|....| ....|....| ....|....| ....|....| ....|....| ....|....|

5465 5475 5485 5495 5505 5515

P4 .......... .......... .......... .......... .......... ..........

Subject .......... .......... .......... .......... .......... ..........

BCR-ABL1 CAGGAGGCGG CCGGGGAGGC AGTCCTGGGC GCAAAGACAA AAGCCACGAG TCTGGTTGAT

BCR .......... .......... .......... .......... .......... ..........

ABL CAGGAGGCGG CCGGGGAGGC AGTCCTGGGC GCAAAGACAA AAGCCACGAG TCTGGTTGAT

....|....| ....|....| ....|....| ....|....| ....|....| ....|....|

5525 5535 5545 5555 5565 5575

P4 .......... .......... .......... .......... .......... ..........

Subject .......... .......... .......... .......... .......... ..........

BCR-ABL1 GCTGTGAACA GTGACGCTGC CAAGCCCAGC CAGCCGGGAG AGGGCCTCAA AAAGCCCGTG

BCR .......... .......... .......... .......... .......... ..........

ABL GCTGTGAACA GTGACGCTGC CAAGCCCAGC CAGCCGGGAG AGGGCCTCAA AAAGCCCGTG

....|....| ....|....| ....|....| ....|....| ....|....| ....|....|

5585 5595 5605 5615 5625 5635

P4 .......... .......... .......... .......... .......... ..........

Subject .......... .......... .......... .......... .......... ..........

BCR-ABL1 CTCCCGGCCA CTCCAAAGCC ACAGTCCGCC AAGCCGTCGG GGACCCCCAT CAGCCCAGCC

BCR .......... .......... .......... .......... .......... ..........

ABL CTCCCGGCCA CTCCAAAGCC ACAGTCCGCC AAGCCGTCGG GGACCCCCAT CAGCCCAGCC

....|....| ....|....| ....|....| ....|....| ....|....| ....|....|

5645 5655 5665 5675 5685 5695

P4 .......... .......... .......... .......... .......... ..........

Subject .......... .......... .......... .......... .......... ..........

BCR-ABL1 CCCGTTCCCT CCACGTTGCC ATCAGCATCC TCGGCCCTGG CAGGGGACCA GCCGTCTTCC

BCR .......... .......... .......... .......... .......... ..........

ABL CCCGTTCCCT CCACGTTGCC ATCAGCATCC TCGGCCCTGG CAGGGGACCA GCCGTCTTCC

....|....| ....|....| ....|....| ....|....| ....|....| ....|....|

5705 5715 5725 5735 5745 5755

P4 .......... .......... .......... .......... .......... ..........

Subject .......... .......... .......... .......... .......... ..........

BCR-ABL1 ACTGCCTTCA TCCCTCTCAT ATCAACCCGA GTGTCTCTTC GGAAAACCCG CCAGCCTCCA

BCR .......... .......... .......... .......... .......... ..........

ABL ACTGCCTTCA TCCCTCTCAT ATCAACCCGA GTGTCTCTTC GGAAAACCCG CCAGCCTCCA

....|....| ....|....| ....|....| ....|....| ....|....| ....|....|

5765 5775 5785 5795 5805 5815

P4 .......... .......... .......... .......... .......... ..........

Subject .......... .......... .......... .......... .......... ..........

BCR-ABL1 GAGCGGATCG CCAGCGGCGC CATCACCAAG GGCGTGGTCC TGGACAGCAC CGAGGCGCTG

BCR .......... .......... .......... .......... .......... ..........

ABL GAGCGGATCG CCAGCGGCGC CATCACCAAG GGCGTGGTCC TGGACAGCAC CGAGGCGCTG

....|....| ....|....| ....|....| ....|....| ....|....| ....|....|

5825 5835 5845 5855 5865 5875

P4 .......... .......... .......... .......... .......... ..........

Subject .......... .......... .......... .......... .......... ..........

BCR-ABL1 TGCCTCGCCA TCTCTAGGAA CTCCGAGCAG ATGGCCAGCC ACAGCGCAGT GCTGGAGGCC

BCR .......... .......... .......... .......... .......... ..........

ABL TGCCTCGCCA TCTCTAGGAA CTCCGAGCAG ATGGCCAGCC ACAGCGCAGT GCTGGAGGCC

....|....| ....|....| ....|....| ....|....| ....|....| ....|....|

5885 5895 5905 5915 5925 5935

P4 .......... .......... .......... .......... .......... ..........

Subject .......... .......... .......... .......... .......... ..........

BCR-ABL1 GGCAAAAACC TCTACACGTT CTGCGTGAGC TATGTGGATT CCATCCAGCA AATGAGGAAC

BCR .......... .......... .......... .......... .......... ..........

ABL GGCAAAAACC TCTACACGTT CTGCGTGAGC TATGTGGATT CCATCCAGCA AATGAGGAAC

....|....| ....|....| ....|....| ....|....| ....|....| ....|....|

5945 5955 5965 5975 5985 5995

P4 .......... .......... .......... .......... .......... ..........

Subject .......... .......... .......... .......... .......... ..........

BCR-ABL1 AAGTTTGCCT TCCGAGAGGC CATCAACAAA CTGGAGAATA ATCTCCGGGA GCTTCAGATC

BCR .......... .......... .......... .......... .......... ..........

ABL AAGTTTGCCT TCCGAGAGGC CATCAACAAA CTGGAGAATA ATCTCCGGGA GCTTCAGATC

....|....| ....|....| ....|....| ....|....| ....|....| ....|....|

6005 6015 6025 6035 6045 6055

P4 .......... .......... .......... .......... .......... ..........

Subject .......... .......... .......... .......... .......... ..........

BCR-ABL1 TGCCCGGCGA CAGCAGGCAG TGGTCCGGCG GCCACTCAGG ACTTCAGCAA GCTCCTCAGT

BCR .......... .......... .......... .......... .......... ..........

ABL TGCCCGGCGA CAGCAGGCAG TGGTCCGGCG GCCACTCAGG ACTTCAGCAA GCTCCTCAGT

....|....| ....|....| ....|....| ....|.

6065 6075 6085 6095

P4 .......... .......... .......... ......

Subject .......... .......... .......... ......

BCR-ABL1 TCGGTGAAGG AAATCAGTGA CATAGTGCAG AGGTAG

BCR .......... .......... .......... ......

ABL TCGGTGAAGG AAATCAGTGA CATAGTGCAG AGGTAG

Dark turquoise sequence in *BCR* exon 12 (3123 – 3198)

Green sequence in *BCR* exon 12 (3123 – 3198)

Blue sequence in *BCR* exon 13 (3199 – 3303)

Grey sequence in *BCR* exon 14 (3304 – 3378)

Dark green sequence in *ABL1* exon 2 (272 – 445)

Dark grey sequence in *ABL1* exon 3 (446 – 741)

Purple sequence in our primer

Note:

Referred to the BCR sequence transcript variant 1 NM_004327.3 (retrieved 12th May 2018 from NCBI <https://www.ncbi.nlm.nih.gov/nuccore/NM_004327.3?report=genbank&to=6927>)

Referred to ABL1 sequence transcript variant a NM_005157.5 (retrieved 24th October 2018 from NCBI <https://www.ncbi.nlm.nih.gov/nuccore/NM_005157.5>)
