# Supplementary material for: Low prevalence of the BCR–ABL1 fusion gene in a normal population in southern Sarawak
Source: Springer Nature journal article supplement (doi:10.1007/s12185-019-02768-x), 2019-11-09
Supplement: MOESM4 [file 17370360]

Supplementary Table 3. Evaluation data of 12 runs of *BCR-ABL1*-qPCRIS in the present study

| Run Evaluation Criteria | Accepted Result | Mean (SD) | Range |
| --- | --- | --- | --- |
| Slope of BCR-ABL Standard Curve | -3.45 ± 0.3 | -3.440 (0.169) | -3.812 – -3.209 |
| y-intercept of BCR-ABL Standard Curve [Ct] | 35-37 | 36.5 (0.7) | 35.6 – 37.9 |
| r2 value of BCR-ABL Standard Curve | > 0.99 | 0.996 (0.003) | 0.988 – 0.999 |
| NTC (Water) Control | No amplification | All runs showed no amplification | |
| BCR-ABL/ABL ratio of Low Control RNA [%IS] | 0.06 - 0.24 | 0.1039 (0.028) | 0.064 – 0.157 |
| BCR-ABL/ABL ratio of High Control RNA [%IS] | 6.0 - 24.0 | 10.0042 (2.232) | 5.76 – 12.2 |
| Negative Control RNA [BCR-ABL copies] | 0 | All runs were 0 or negative | |
| Negative Control RNA [ABL copies] | > 30,000 | 34,802 (8,713) | 15,907 – 47,026 |
| Low (MR3) Control RNA [ABL copies] | > 30,000 | 33,942 (8,630) | 21,178 – 44,462 |
| High (MR1) Control RNA [ABL copies] | > 30,000 | 38,019 (10,292) | 21,910 - 53132 |
| Test Samples [ABL copies] | >10,000 | 146 out of 190 subjects (76.8%) fulfill the criteria | |

MR, molecular response in log; NTC, no template control; SD, standard deviation
